# Supplementary material for: Live Birth After Oocyte Donation In Vitro Fertilization Cycles in Women With Endometriosis: A Systematic Review and Meta-Analysis
Source: PubMed Central journal article supplement (PMC10831577; doi:10.1001/jamanetworkopen.2023.54249), 2024-01-31
Supplement: jamanetwopen-e2354249-s001.pdf [file jamanetwopen-e2354249-s001.pdf]

## Supplemental Online Content

Paffoni A, Casalechi M, De Ziegler D, et al. Live birth after oocyte donation in vitro fertilization cycles in women with endometriosis: a systematic review and meta-analysis. *JAMA Netw Open*. 2024;7(2):e2354249. doi:10.1001/jamanetworkopen.2023.54249

**eAppendix.** Supplemental Methods

**eTable 1.** Modified Newcastle-Ottawa Scoring Items

**eTable 2.** Results From Assessment of the Risk of Study Bias

**eTable 3.** Results From Assessment of the Quality of Evidence

**eFigure 1.** PRISMA Flow Diagram

**eFigure 2.** Forest Plots for Live Birth Rate for the Unadjusted (A) and Mixed Models (B) Subgroup Analysis Based on the Type of Oocyte Donation Cycles (Fresh vs. Frozen)

**eTable 4.** Comparison of Main Characteristics of Women With and Without Endometriosis Included in the HFEA Register

**eTable 5.** Live Birth Rates and Implantation Rates in Women With and Without Endometriosis Undergoing Donor Egg Cycles Across Various Age Categories Based on the HFEA Dataset

This supplemental material has been provided by the authors to give readers additional information about their work.

## **eAppendix. Supplemental Methods**

### **Information Sources, Search, and Eligibility Criteria**

We conducted a comprehensive search of electronic databases, including Scenedirect, Pubmed, Scopus, Embase, the Cochrane library, Clinicaltrials.gov, EU Clinical Trials Register, and World Health Organization International Clinical Trials Registry, until August 31, 2023, without date restrictions. Two authors (A.V., M.C.) independently assessed the electronic search and study eligibility. Our search terms included endometriosis, endometrioma, donor IVF, oocyte donation, oocyte recipient, and heterologous IVF. After removing duplicates, we screened citations based on titles and abstracts. Additionally, we manually searched the references of included studies to ensure we did not miss any relevant research. Any disagreements were resolved through consensus, and selected items were thoroughly evaluated for eligibility in full-text.

### **Study selection and Data Collection Process**

The inclusion of studies was based on the following criteria: oocyte donation cycles with donors under 35 years of age unaffected by endometriosis; comparison between women with endometriosis versus without endometriosis; reported frequencies of women achieving clinical pregnancy rate or live birth in the two groups; studies reported in the English language; full-text studies. The following exclusion criteria were applied: case reports, case series, non-controlled studies; non-original or duplicated data.

The data extraction process was conducted by two authors (A.V., M.C.) who collected information on study characteristics, populations (number of patients and inclusion criteria), embryo transfer cycle (protocol for endometrial preparation, luteal phase support), and study outcomes. Outcome data were obtained from the text and/or tables of the original studies. If outcome data were not explicitly mentioned, they were calculated based on other available outcome data (e.g., miscarriage rate calculated as the difference between clinical and ongoing pregnancies). In case of missing data, the authors of the original studies were contacted to obtain additional information relevant to the outcomes of our study. One author (P.V.) reviewed the entire data extraction process.

### **Assessment of the risk of bias**

Two reviewers (A.V., M.C.) independently judged the methodological quality of studies included in the meta-analysis using a modified version of the “Newcastle-Ottawa Scale”. Quality of the studies was evaluated in five different domains: “*sample representativeness*”, “*sampling technique*”, “*ascertainment of endometriosis diagnosis*”, “*quality of description of the population*”, “*incomplete outcome data*”. According to the total number of points assigned, each study was judged to be at low risk of bias ( $\geq 3$  points) or high risk of bias ( $< 3$  points). Any discrepancies concerning Author’s judgements were referred to a third reviewer (P.V.) and resolved by consensus.

### **Grading of evidence**

The body of evidence was assessed by two Authors (A.V., A.P.) using the GRADE (Grading of Recommendations Assessment Development and Evaluation working group) methodology. The final score was obtained by evaluating the following domains: *study design, risk of bias, indirectness, inconsistency, imprecision, large effect size, plausible confounding and publication bias*. *Dose response gradient* was not evaluated since the intervention was dichotomous.

**eTable 1: Modified Newcastle-Ottawa Scoring Items.**

**(1) Sample representativeness:**

1 point: Sample size was greater than or equal to 100 participants per group.

0 points: Sample size was less than 100 participants per group.

**(2) Sampling technique:**

1 point: Patients recruited consecutively or randomly, with or without matching techniques.

0 points: Potential convenience sampling or unspecified sampling technique.

**(3) Ascertainment of endometriosis diagnosis:**

1 point: The criteria for the diagnosis of endometriosis were clearly described and included the use of one or more of the following techniques, including transvaginal ultrasound, magnetic resonance imaging, and laparoscopy.

0 points: The diagnosis was based on other unvalidated approaches (e.g., chronic pelvic pain), or the diagnostic methods were not described.

**(4) Quality of population description:**

1 point: The study reported a clear description of the population (e.g. age, BMI, duration of infertility) with proper measures of dispersion (e.g., mean, standard deviation) and ovarian stimulation-embryo transfer protocol.

0 points: The study did not report a clear description of the population or ovarian stimulation-embryo transfer protocol, incompletely reported descriptive statistics, or did not report measures of dispersion.

**(5) Incomplete outcome data:**

1 point: The study reported complete data about the primary outcome of the review (live birth rate).

0 points: Selective data reporting could not be excluded.

**Legend:** The individual components listed above are summed to generate a total modified Newcastle-Ottawa risk of bias score for each study. Total scores range from 0 to 5.

For the total score grouping, studies were judged to be of low risk of bias ( $\geq 3$  points) or high risk of bias ( $< 3$  points).

eTable 2: Results From Assessment of the Risk of Study Bias

| STUDY ID                  | SAMPLE REPRESENTATIVENESS | SAMPLING TECHNIQUE | ASCERTAIN-MENT OF ENDOMETRIOSIS DIAGNOSIS | QUALITY OF DESCRIPTION OF THE POPULATION | INCOMPLETE OUTCOME DATA | TOTAL SCORE | RISK OF BIAS |
|---------------------------|---------------------------|--------------------|-------------------------------------------|------------------------------------------|-------------------------|-------------|--------------|
| <i>Diaz et al, 2010</i>   | -                         | -                  | ★                                         | ★                                        | ★                       | ★★★         | LOW          |
| <i>Kamath et al, 2022</i> | ★                         | ★                  | -                                         | -                                        | ★                       | ★★★         | LOW          |
| <i>Prapas et al, 2012</i> | ★                         | -                  | ★                                         | ★                                        | ★                       | ★★★★        | LOW          |
| <i>Sung et al, 1997</i>   | -                         | ★                  | ★                                         | -                                        | -                       | ★★          | HIGH         |

**eTable 3: Results From Assessment of the Quality of Evidence**

| <b>Endometriosis compared to Controls in oocyte donation cycles</b> |                                        |                                      |                                  |                                   |                                   |          |
|---------------------------------------------------------------------|----------------------------------------|--------------------------------------|----------------------------------|-----------------------------------|-----------------------------------|----------|
| Patient or population: oocyte donation cycles                       |                                        |                                      |                                  |                                   |                                   |          |
| Intervention: Endometriosis                                         |                                        |                                      |                                  |                                   |                                   |          |
| Comparison: Controls                                                |                                        |                                      |                                  |                                   |                                   |          |
| Outcomes                                                            | Anticipated absolute effects* (95% CI) |                                      | Relative effect (95% CI)         | No of participants (studies)      | Certainty of the evidence (GRADE) | Comments |
|                                                                     | Risk with Controls                     | Risk with Endometriosis              |                                  |                                   |                                   |          |
| Live birth rate (LBR)                                               | 311 per 1,000                          | <b>255 per 1,000</b><br>(190 to 333) | <b>OR 0.76</b><br>(0.52 to 1.11) | 6973<br>(3 observational studies) | ⊕⊕○○<br>Low <sup>a</sup>          |          |
| Clinical Pregnancy Rate (CPR)                                       | 409 per 1,000                          | <b>327 per 1,000</b><br>(250 to 417) | <b>OR 0.70</b><br>(0.48 to 1.03) | 537<br>(3 observational studies)  | ⊕○○○<br>Very low <sup>a,c</sup>   |          |
| Implantation Rate (IR)                                              | 189 per 1,000                          | <b>152 per 1,000</b><br>(121 to 189) | <b>OR 0.77</b><br>(0.59 to 1.00) | 1679<br>(3 observational studies) | ⊕○○○<br>Very low <sup>a,c</sup>   |          |
| Miscarriage Rate (MR)                                               | 153 per 1,000                          | <b>191 per 1,000</b><br>(90 to 361)  | <b>OR 1.31</b><br>(0.55 to 3.13) | 149<br>(2 observational studies)  | ⊕○○○<br>Very low <sup>a</sup>     |          |

\*The risk in the intervention group (and its 95% confidence interval) is based on the assumed risk in the comparison group and the relative effect of the intervention (and its 95% CI).

CI: confidence interval; OR: odds ratio

**GRADE Working Group grades of evidence**  
**High certainty:** we are very confident that the true effect lies close to that of the estimate of the effect.  
**Moderate certainty:** we are moderately confident in the effect estimate: the true effect is likely to be close to the estimate of the effect, but there is a possibility that it is substantially different.  
**Low certainty:** our confidence in the effect estimate is limited: the true effect may be substantially different from the estimate of the effect.  
**Very low certainty:** we have very little confidence in the effect estimate: the true effect is likely to be substantially different from the estimate of effect.

**Explanations**

- a. Higgins I<sup>2</sup> value between 30% and 60% indicating moderate statistical heterogeneity in the study results.
- b. Low number of patients and events. Two studies included in the analysis utilized an older clinical and laboratory standard (studies published in 1997 and 2000).
- c. All the studies performed multiple embryo transfers at the cleavage stage (ranging from 2 to 4 embryos per single transfer).
- d. Low number of events and pregnancies. High risk of twin pregnancies due to multiple embryo transfers. Significant age differences between patients with endometriosis and those without endometriosis (women with endometriosis older on average).

eFig.1 PRISMA Flow-Diagram

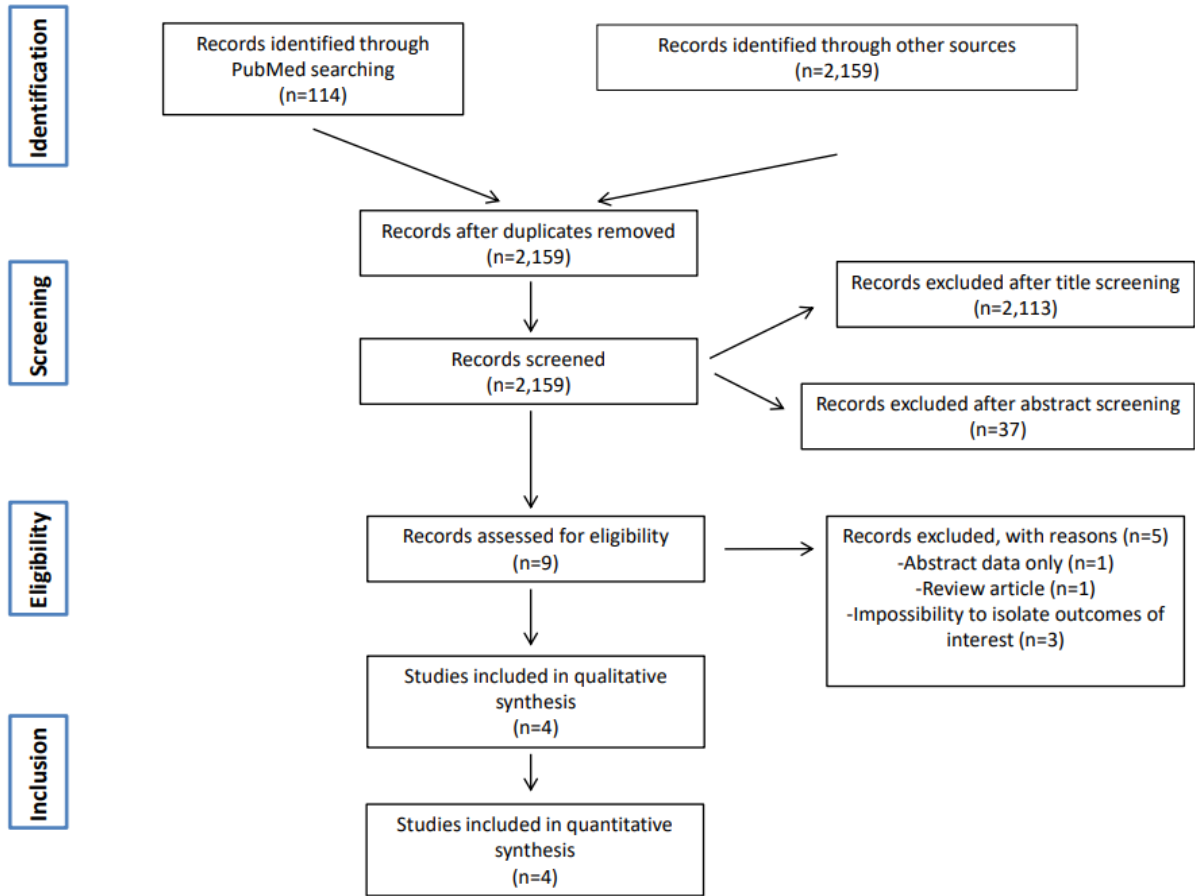

eFigure 1. PRISMA Flow Diagram

**A**

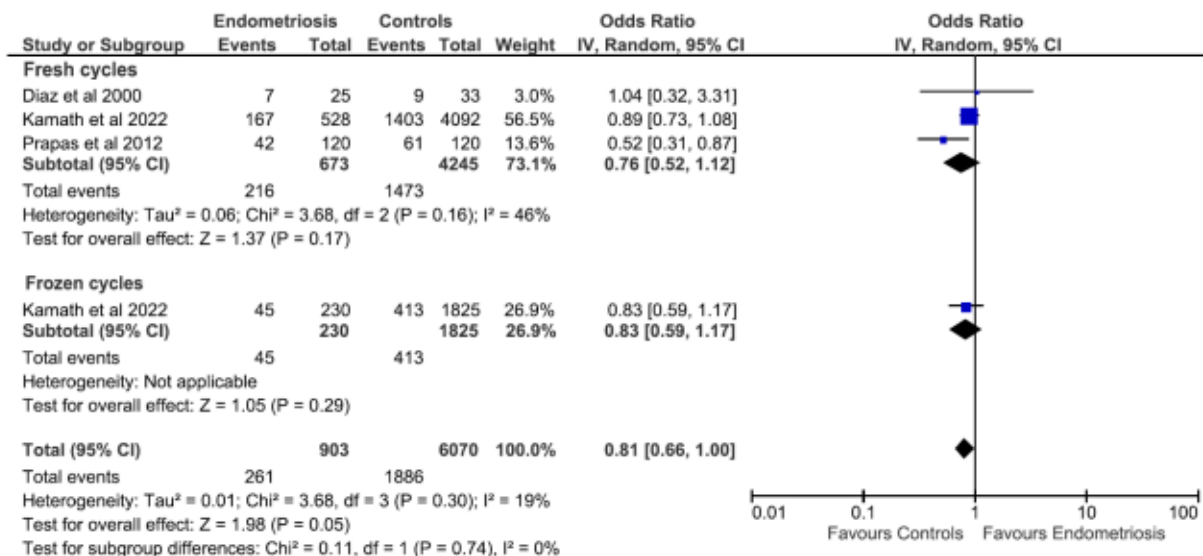

**B**

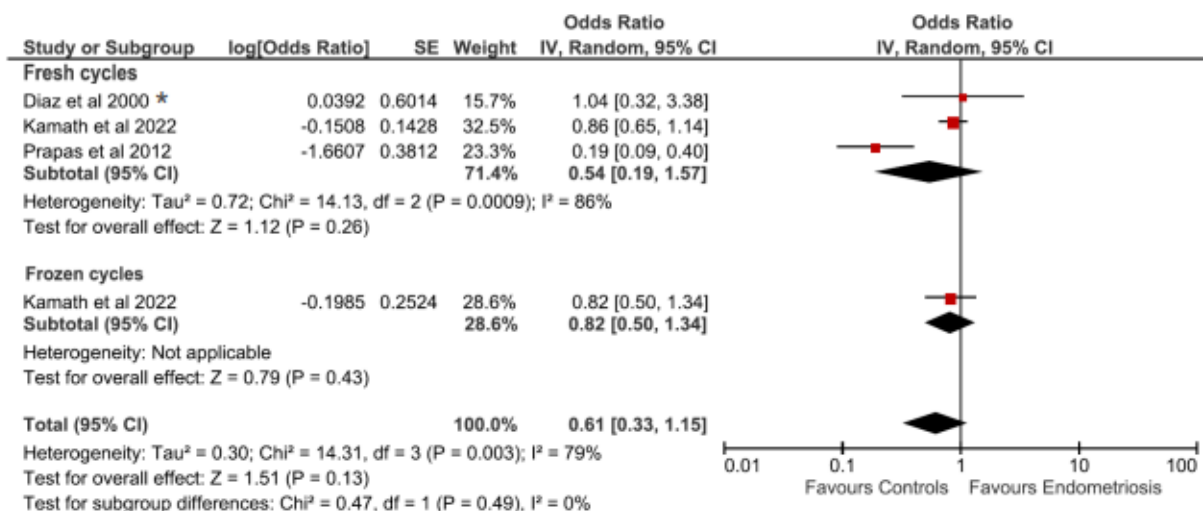

**Figure 2.** Forest plots for live birth rate for the unadjusted (A) and mixed models (B) subgroup analysis based on the type of oocyte donation cycles (fresh vs. frozen). The asterisk refers to non-adjusted data. Blue squares refer to dichotomous variables presented in A. Red squares indicate the inclusion of log odds ratio and the standard error of the log odds ratio in the meta-analysis shown in B. Size of the squares depends on the weight assigned to each study in the analysis.



eTable 4: Comparison of Main Characteristics of Women With and Without Endometriosis Included in the HFEA Register.

|                                        | Endometriosis,<br>Total=931 |       | Controls,<br>Total=23969 |       | <i>p</i> |
|----------------------------------------|-----------------------------|-------|--------------------------|-------|----------|
|                                        | n                           | %     | n                        | %     |          |
| Patient age                            |                             |       |                          |       | 0.001    |
| Patient age (18-34 years)              | 145                         | 15.6% | 4419                     | 18.4% |          |
| Patient age (35-37 years)              | 157                         | 16.9% | 2685                     | 11.2% |          |
| Patient age (38-39 years)              | 118                         | 12.7% | 2328                     | 9.7%  |          |
| Patient age (40-42 years)              | 248                         | 26.6% | 4709                     | 19.6% |          |
| Patient age (43-44 years)              | 131                         | 14.1% | 3779                     | 15.8% |          |
| Patient age (45-50 years)              | 132                         | 14.2% | 6049                     | 25.2% |          |
| Egg donor age                          |                             |       |                          |       | 0.001    |
| Egg donor age (<21 years)              | 17                          | 1.8%  | 597                      | 2.5%  |          |
| Egg donor age (21-25 years)            | 194                         | 20.8% | 4058                     | 16.9% |          |
| Egg donor age (26-30 years)            | 333                         | 35.8% | 8119                     | 33.9% |          |
| Egg donor age (31-35 years)            | 376                         | 40.4% | 10481                    | 43.7% |          |
| Egg donor age (>35 years)              | 11                          | 1.2%  | 714                      | 3.0%  |          |
| Patients with previous ART live births | 123/893*                    | 13.8% | 3310/22292*              | 14.8% | 0.38     |
| Presence of a male factor              | 204                         | 21.9% | 4875                     | 20.3% | 0.24     |
| N° embryos transferred                 |                             |       |                          |       | 0.74     |
| 1                                      | 556                         | 59.7% | 14344                    | 59.8% |          |
| 2                                      | 375                         | 40.3% | 9610                     | 40.1% |          |
| 3                                      | 0                           | 0.0%  | 15                       | 0.1%  |          |
| Year of treatment                      |                             |       |                          |       | 0.93     |
| 2010-2014                              | 425                         | 45.6% | 10979                    | 45.8% |          |
| 2015-2018                              | 506                         | 54.4% | 12990                    | 54.2% |          |
| Type of cycle                          |                             |       |                          |       | 0.96     |
| Fresh oocytes                          | 516                         | 55.4% | 13337                    | 55.6% |          |
| Frozen oocytes                         | 64                          | 6.9%  | 1588                     | 6.6%  |          |
| Thawed embryos                         | 351                         | 6.9%  | 9044                     | 37.7% |          |
| Double donation                        | 49                          | 5.3%  | 5018                     | 20.9% | 0.001    |

\* Missing information in 38 cases and 1677 controls. ART: Assisted Reproductive Technologies

Table 5. Live birth rates and implantation rates in women with and without endometriosis undergoing donor egg cycles across various age categories based on the HFEA dataset

| Patients' age, n      | Outcome               | 2010-2014             |                 | 2015-2018     |               | Total         |               |
|-----------------------|-----------------------|-----------------------|-----------------|---------------|---------------|---------------|---------------|
|                       |                       | Endometriosis         | Controls        | Endometriosis | Controls      | Endometriosis | Controls      |
| 18-34 years, n=4564   | Live birth occurrence | n 18<br>% 23,7%       | 667<br>35,0%    | 28<br>40,6%   | 950<br>37,8%  | 46<br>31,7%   | 1617<br>36,6% |
|                       | Number of foetal sacs | 0 50                  | 1161            | 23 771        |               | 73 1932       |               |
|                       | with pulsation        | 1 21                  | 601             | 30 969        |               | 51 1570       |               |
|                       |                       | 2 5                   | 145             | 5 123         |               | 10 268        |               |
|                       |                       | 3 0                   | 1               | 0 1           |               | 0 2           |               |
|                       | Embryos transferred   | 1 36                  | 979             | 44 1889       |               | 80 2868       |               |
|                       |                       | 2 40                  | 926             | 25 622        |               | 65 1548       |               |
|                       |                       | 3 0                   | 3               | 0 0           |               | 0 3           |               |
|                       | Crude Implantation    | 26,7%                 | 31,5%           | 42,6%         | 38,9%         | 33,8%         | 35,4%         |
|                       | 35-37 years, n=2842   | Live birth occurrence | n 27<br>% 38,6% | 437<br>35,6%  | 27<br>31,0%   | 536<br>36,7%  | 54<br>34,4%   |
| Number of foetal sacs |                       | 0 41                  | 747             | 34 468        |               | 75 1215       |               |
| with pulsation        |                       | 1 22                  | 386             | 28 573        |               | 50 959        |               |
|                       |                       | 2 7                   | 93              | 3 47          |               | 10 140        |               |
|                       |                       | 3 0                   | 0               | 0 2           |               | 0 2           |               |
| Embryos transferred   |                       | 1 33                  | 566             | 54 1083       |               | 87 1649       |               |
|                       |                       | 2 37                  | 660             | 33 375        |               | 70 1035       |               |
|                       |                       | 3 0                   | 0               | 0 1           |               | 0 1           |               |
| Crude Implantation    |                       | 33,6%                 | 30,3%           | 28,3%         | 36,7%         | 30,8%         | 33,4%         |
| 38-39 years, n=2446   |                       | Live birth occurrence | n 17<br>% 32,1% | 406<br>36,2%  | 25<br>38,5%   | 456<br>37,8%  | 42<br>35,6%   |
|                       | Number of foetal sacs | 0 34                  | 669             | 24 384        |               | 58 1053       |               |
|                       | with pulsation        | 1 16                  | 349             | 29 476        |               | 45 825        |               |
|                       |                       | 2 3                   | 102             | 3 44          |               | 6 146         |               |
|                       |                       | 3 0                   | 2               | 0 1           |               | 0 3           |               |
|                       | Embryos transferred   | 1 22                  | 459             | 45 865        |               | 67 1324       |               |
|                       |                       | 2 31                  | 662             | 20 341        |               | 51 1003       |               |
|                       |                       | 3 0                   | 1               | 0 0           |               | 0 1           |               |
|                       | Crude Implantation    | 26,2%                 | 31,3%           | 41,2%         | 36,7%         | 33,7%         | 33,8%         |
|                       | 40-42 years, n=4957   | Live birth occurrence | n 39<br>% 33,3% | 831<br>36,3%  | 44<br>33,6%   | 928<br>36,3%  | 83<br>33,5%   |
| Number of foetal sacs |                       | 0 74                  | 1345            | 39 831        |               | 113 2176      |               |
| with pulsation        |                       | 1 37                  | 748             | 51 951        |               | 88 1699       |               |
|                       |                       | 2 6                   | 193             | 3 118         |               | 9 311         |               |
|                       |                       | 3 0                   | 1               | 0 3           |               | 0 4           |               |
| Embryos transferred   |                       | 1 57                  | 931             | 106 1709      |               | 163 2640      |               |
|                       |                       | 2 60                  | 1354            | 25 711        |               | 85 2065       |               |
|                       |                       | 3 0                   | 3               | 0 1           |               | 0 4           |               |
| Crude Implantation    |                       | 27,7%                 | 31,2%           | 36,5%         | 36,2%         | 31,8%         | 34,4%         |
| 43-44 years, n=3910   |                       | Live birth occurrence | n 17<br>% 37,8% | 652<br>37,6%  | 32<br>37,2%   | 781<br>38,2%  | 49<br>37,4%   |
|                       | Number of foetal sacs | 0 28                  | 998             | 37 712        |               | 65 1710       |               |
|                       | with pulsation        | 1 13                  | 576             | 28 793        |               | 41 1369       |               |
|                       |                       | 2 4                   | 158             | 7 95          |               | 11 253        |               |
|                       |                       | 3 0                   | 3               | 0 1           |               | 0 4           |               |
|                       | Embryos transferred   | 1 23                  | 729             | 58 1477       |               | 81 2206       |               |
|                       |                       | 2 22                  | 1006            | 28 566        |               | 50 1572       |               |
|                       |                       | 3 0                   | 0               | 0 1           |               | 0 1           |               |
|                       | Crude Implantation    | 31,3%                 | 32,9%           | 36,8%         | 37,7%         | 34,8%         | 35,3%         |
|                       | 45-50 years, n=6181   | Live birth occurrence | n 22<br>% 34,4% | 882<br>32,7%  | 22<br>32,4%   | 1120<br>33,4% | 44<br>33,3%   |
| Number of foetal sacs |                       | 0 39                  | 1680            | 20 1239       |               | 59 2919       |               |
| with pulsation        |                       | 1 16                  | 828             | 28 1172       |               | 44 2000       |               |
|                       |                       | 2 9                   | 189             | 1 156         |               | 10 345        |               |
|                       |                       | 3 0                   | 3               | 0 2           |               | 0 5           |               |
|                       |                       | >3 0                  | 0               | 0 1           |               | 0 1           |               |
| Embryos transferred   |                       | 1 29                  | 1218            | 49 2439       |               | 78 3657       |               |
|                       |                       | 2 35                  | 1479            | 19 908        |               | 54 2387       |               |
|                       |                       | 3 0                   | 3               | 0 2           |               | 0 5           |               |
| Crude Implantation    |                       | 34,3%                 | 29,0%           | 34,5%         | 35,0%         | 34,4%         | 32,1%         |
| Overall               | Live birth occurrence | n 140<br>% 32,9%      | 3875<br>35,3%   | 178<br>35,2%  | 4771<br>36,7% | 318<br>34,2%  | 8646<br>36,1% |
|                       | Crude Implantation    | 29,7%                 | 30,9%           | 36,3%         | 37,1%         | 33,0%         | 34,0%         |
