# Supplementary material for: Live Birth After Oocyte Donation In Vitro Fertilization Cycles in Women With Endometriosis: A Systematic Review and Meta-Analysis
Source: PubMed Central journal article supplement (PMC10831577; doi:10.1001/jamanetworkopen.2023.54249), 2024-01-31
Supplement: jamanetwopen-e2354249-s002.pdf [file jamanetwopen-e2354249-s002.pdf]

## Data Sharing Statement

Paffoni. Live Birth After Oocyte Donation In Vitro Fertilization Cycles in Women With Endometriosis. *JAMA Netw Open*. Published February 01, 2024.

doi:10.1001/jamanetworkopen.2023.54249

### Data

**Data available:** Yes

**Data types:** Deidentified participant data

**How to access data:** <https://www.sart.org/> <https://www.hfea.gov.uk/>

**When available:** With publication

### Supporting Documents

**Document types:** None

### Additional Information

**Who can access the data:** data are publicly available. Template data collection forms and data extracted from studies can be requested to the corresponding Author.

**Types of analyses:** for research purposes.

**Mechanisms of data availability:** after reasonable request

**Any additional restrictions:** data are publicly available
